# Supplementary material
Source: Research Square preprint supplement (doi:10.21203/rs.3.rs-8918811/v1)
Supplement: Supplementary file 1 [file 06f473c0111235721d4a7008.docx]

#

# Tables and Figures

# Table 1 outcomes stratified by absence/presence of posterior reconstruction (non-PR *versus* PR)

|  | Non-PR | **PR** | **Overall** | **Test** |
| --- | --- | --- | --- | --- |
| **N** | 184 (67.9%) | 87 (32.1%) | 271 (100.0%) |  |
| **Mean age (sd)** | 66.4 (9.475) | 67.6 (12.614) | 66.8 (10.575) | 0.386 |
| **Mean BMI Kg/m2 (sd)** | 26.3 (3.431) | 26.3 (3.132) | 26.3 (3.322) | 0.854 |
| **Preoperative parameters Me(IQR)** |  |  |  |  |
| PSA ng/mL | 7.3 (6.2) | 7.4 (6.9) | 7.4 (6.4) | 0.899 |
| Hb g/dL | 14.9 (1.8) | 15.1 (1.2) | 15.0 (1.6) | 0.205 |
| Charlson Index | 5.0 (1.0) | 4.0 (1.0) | 4.0 (1.0) | 0.092 |
| ASA Score | 2.0 (1.0) | 2.0 (0.0) | 2.0 (0.0) | 0.002 |
| IPSS | 7.0 (10.0) | 10.0 (10.0) | 8.0 (11.0) | 0.033 |
| **Intraoperative parameters Me(IQR)** |  |  |  |  |
| Total Surgery Time In-Out (minutes) | 230.0 (73.5) | 227.0 (67.0) | 230.0 (70.0) | 0.843 |
| Incision To Last Stitch (minutes) | 180.0 (81.0) | 179.0 (55.0) | 180.0 (68.5) | 0.859 |
| Blood loss mL | 100.0 (50.0) | 150.0 (100.0) | 100.0 (100.0) | 0.191 |
| **Histological parameters Me(IQR)** |  |  |  |  |
| Prostate volume at final pathology mL3 | 42.0 (21.5) | 36.0 (22.0) | 40.0 (22.0) | 0.028 |
| Tumor volume at final pathology | 1.9 (2.6) | 1.7 (3.4) | 1.9 (2.9) | 0.952 |
| Primary Gleason at final pathology | 3.0 (1.0) | 3.0 (0.0) | 3.0 (1.0) | 0.025 |
| Secondary Gleason at final pathology | 4.0 (1.0) | 4.0 (1.0) | 4.0 (1.0) | 0.585 |
| Cancer >pT2 |  |  |  |  |
| No | 14 (8.1%) | 13 (21.3%) | 27 (11.5%) | 0.005 |
| Yes | 159 (91.9%) | 48 (78.7%) | 207 (88.5%) |  |
| **Surgical Outcomes** |  |  |  |  |
| Length of stay (days) | 4.0 (1.0) | 3.0 (2.0) | 4.0 (2.0) | <0.001 |
| Hb g/dL | 13.2 (1.7) | 13.2 (1.1) | 13.2 (1.5) | 0.776 |
| Hct % | 38.9 (5.1) | 39.9 (4.4) | 39.3 (4.6) | 0.228 |
| Cystogram n(%) |  |  |  |  |
| No | 87 (47.3%) | 57 (65.5%) | 144 (53.1%) | 0.005 |
| Yes | 97 (52.7%) | 30 (34.5%) | 127 (46.9%) |  |
| Urinary leakage* n(%) |  |  |  | <0.001 |
| No | 27 (28.7%) | 28 (93.3%) | 55 (44.3%) |  |
| Yes | 67 (71.8%) | 2 (6.7%) | 69 (55.7%) |  |
| Complications (> Clavien 1), any type n(%) |  |  |  | 0.013 |
| No | 84(94.4%) | 29(96.7%) | 113(95.0%) |  |
| Yes | 5(5.6%) | 1(3.33%) | 6(5.0%) |  |
| **Postoperative questionnaires Me(IQR)** |  |  |  |  |
| King’s Health QoL score | 2.0 (2.0) | 2.0 (3.0) | 2.0 (2.0) | 0.394 |
| IEEF | 18.0 (12.0) | 18.0 (10.0) | 18.0 (11.0) | 0.517 |
| BMI Body Mass Index, PSA prostate-specific antigen, Hb hemoglobin, ASA American Society of Anesthesiologists, IPSS International Prostate Symptom Score, IEEF International Index of Erectile Function, SD standard deviation, Me median, IQR InterQuartile Range, * only patients undergoing cystogram. | | | | |
